# Supplementary material for: Mesoporous HBeta zeolite obtained via zeolitic dissolution–recrystallization successive treatment for vapor-phase Doebner–Von Miller reaction to quinolines
Source: Royal Society of Chemistry journal article supplement (doi:10.1039/d0nj04539j), 2020-01-01
Supplement: d0nj04539j1.pdf [file d0nj04539j1.pdf]

## Supplementary Information

### Mesoporous HBeta Zeolite via Zeolitic Dissolution-Recrystallization Successive Treatment for Vapor-Phase Doebner-Von Miller Reaction to Quinolines

An Li <sup>a#</sup>, CaiWu Luo <sup>b#</sup>, Fen Wu <sup>a#</sup>, Shuqin Zheng <sup>a</sup>, LiJun Li <sup>a</sup>, JianCe Zhang <sup>a</sup>, Liang Chen <sup>a</sup>, Kun Liu <sup>a\*</sup> and Congshan Zhou <sup>a\*</sup>

<sup>a</sup> *Province Key Laboratory for Fine Petrochemical Catalysis and Separation, College of Chemistry and Chemical Engineering, Hunan Institute of Science and Technology, Yueyang, Hunan, 414000, P. R. China.*

<sup>b</sup> *School of Environmental Protection and Safety Engineering, University of South China, Hengyang, Hunan 421001, China.*

<sup>#</sup> *Coauthors equally contributed to this work.*

<sup>\*</sup> *Corresponding author. Email: [anlechn@hotmail.com](mailto:anlechn@hotmail.com) & [liukun328@126.com](mailto:liukun328@126.com) & [zhoucongsh@126.com](mailto:zhoucongsh@126.com).*

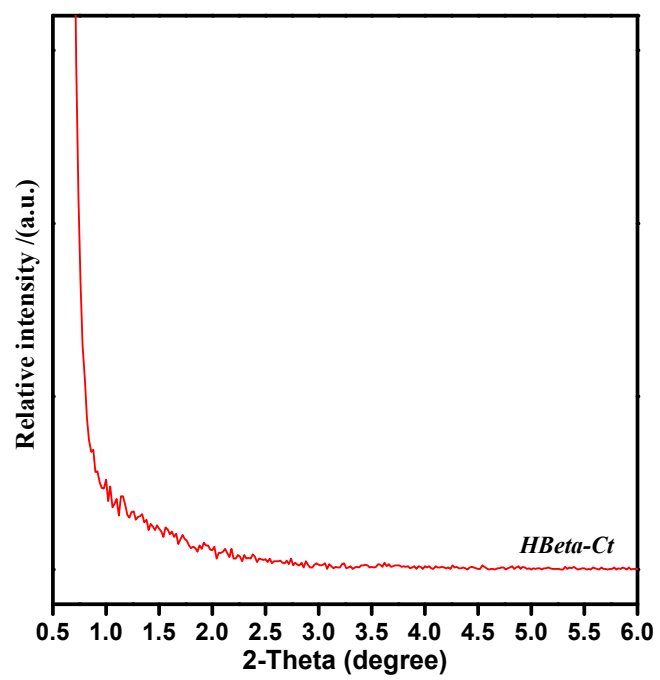

**Figure 1S.** the low-angle XRD patterns of HBeta-Ct.

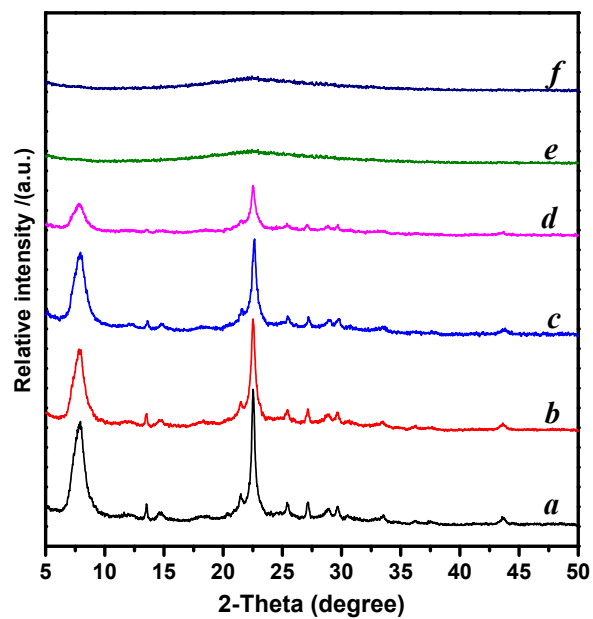

**Figure 2S.** the XRD patterns of parent HBeta(*a*) and alkali-treated HBeta with NaOH concentrations of 0.2(*b*) 0.4(*c*) 0.6(*d*) 1.0(*e*) and 1.85(*f*) mol/L at 40 °C for 70 min.

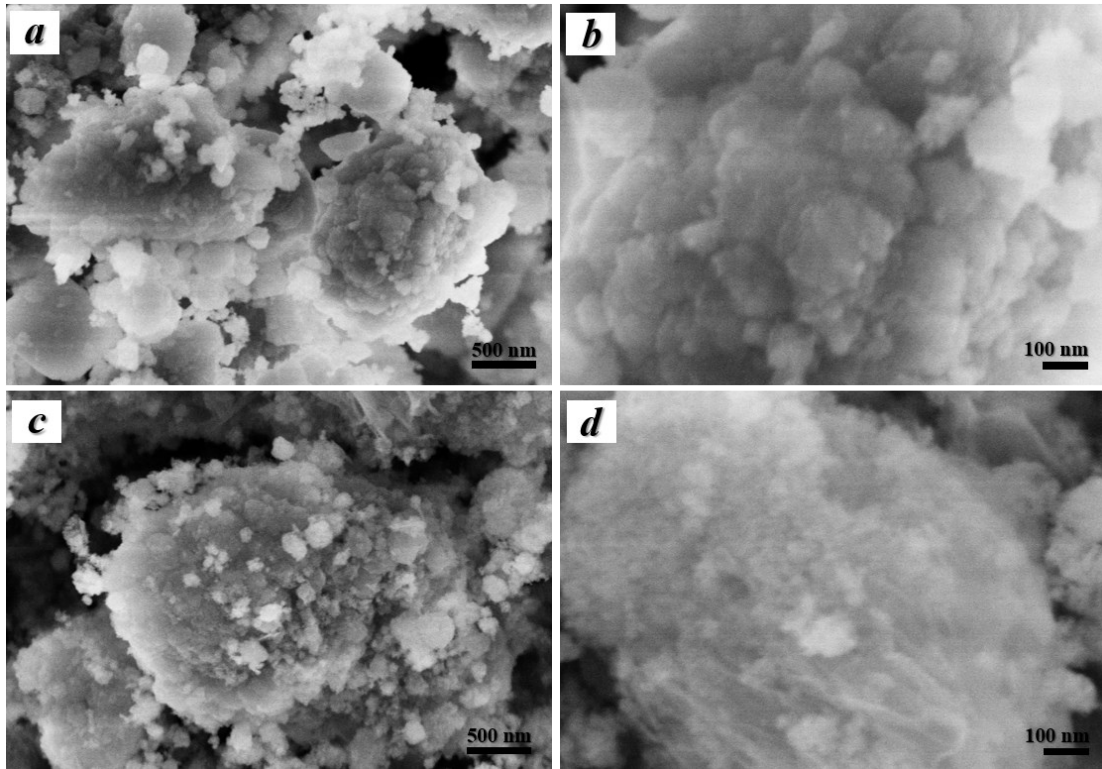

**Figure 3S.** The SEM images of HBeta(*a, b*) and HBeta-Ct(*c, d*)

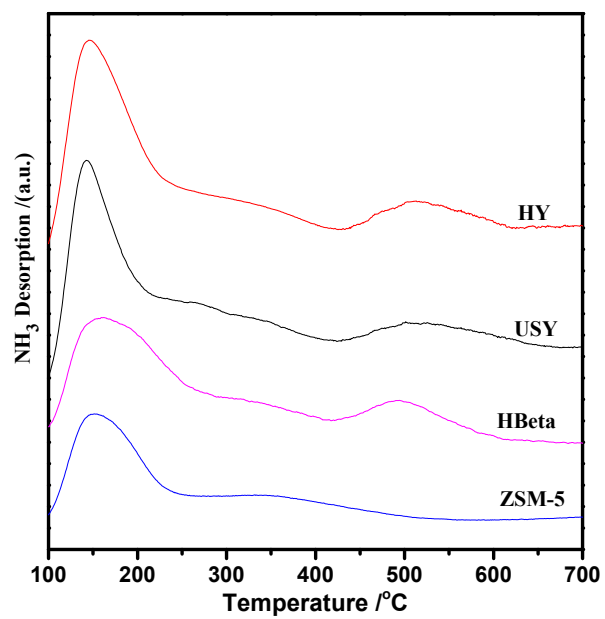

**Figure 4S.** the NH<sub>3</sub>-TPD for various zeolite catalysts

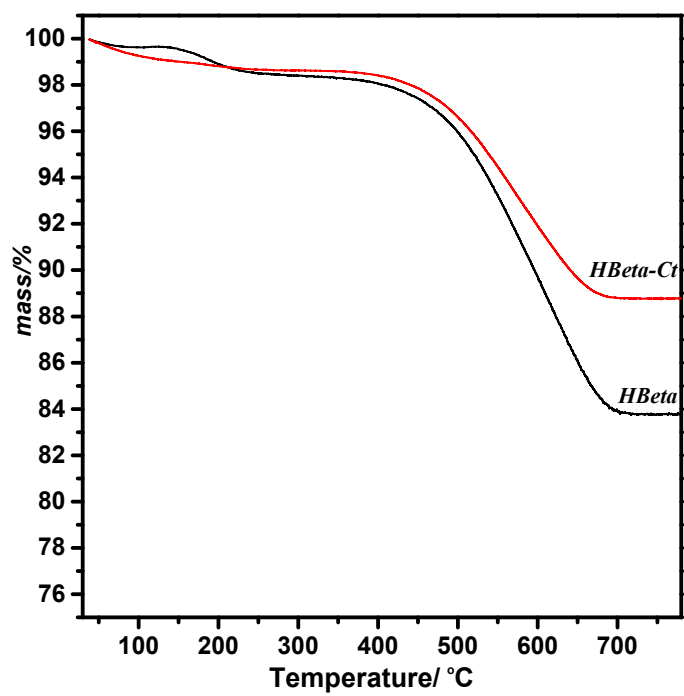

Figure 5S. the TG profiles of deactivated catalysts

**Table 1S.** the textural properties of catalysts.

| Catalyst | Si/Al ratio <sup>a</sup> | Relative crystallinity | Yield of product |
|----------|--------------------------|------------------------|------------------|
| HBeta    | 25                       | 100                    | --               |
| HBeta-Ct | 22                       | 94.3                   | 93.4             |

<sup>a</sup> The Si/Al ratio of the parent and treated Beta zeolite was determined via ICP-OES.

**Table 2S.** the NH<sub>3</sub>-TPD results for various zeolite catalysts.

| Catalyst | T <sub>i</sub> <sup>a</sup> (°C) and A <sub>i</sub> <sup>b</sup> (mmol/g) for various desorption peaks |                |                |                |                    |
|----------|--------------------------------------------------------------------------------------------------------|----------------|----------------|----------------|--------------------|
|          | T <sub>1</sub>                                                                                         | A <sub>1</sub> | T <sub>2</sub> | A <sub>2</sub> | A <sub>total</sub> |
| ZSM-5    | 154.8                                                                                                  | 1.08           | 363.9          | 0.10           | 1.18               |
| HBeta    | 159.6                                                                                                  | 1.23           | 494.5          | 0.35           | 1.58               |
| HUSY     | 143.3                                                                                                  | 1.25           | 509.3          | 0.36           | 1.61               |
| HY       | 145.7                                                                                                  | 1.29           | 512.6          | 0.41           | 1.70               |

<sup>a</sup> T<sub>i</sub> refers to the temperature at the maximum of desorption peak i.

<sup>b</sup> A<sub>i</sub> refers to the integral area of desorption peak i, and it means also the concentration of acid site corresponding to the desorption peak i; A<sub>total</sub> stands for the sum of the concentration of various acid site, i.e., A<sub>total</sub> = ΣA<sub>i</sub>.
